# Supplementary material for: Flipping states: a few key residues decide the winning conformation of the only universally conserved transcription factor
Source: PubMed Central journal article supplement — Nucleic Acids Res. 2017 Jun 10;45(15):8835–43. doi: 10.1093/nar/gkx523 (PMC5587751; doi:10.1093/nar/gkx523), 2017-06-10
Supplement: gkx523_Supp.pdf [file gkx523_Supp.pdf]

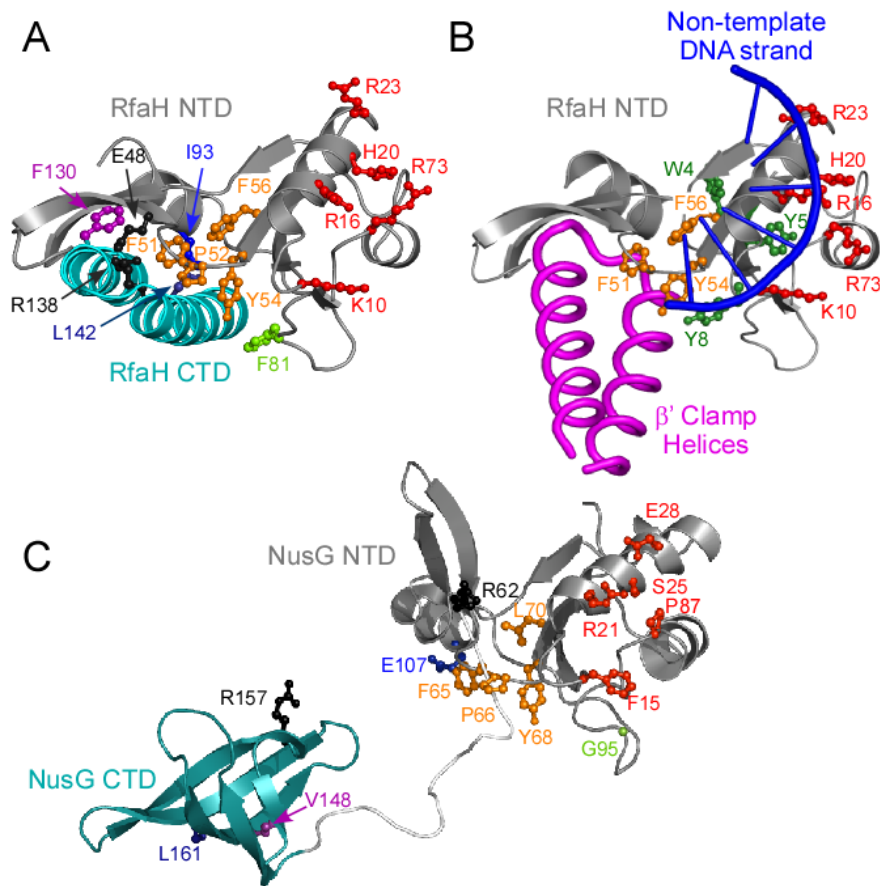

**Supplementary Figure 1.** Different states of RfaH and NusG proteins. (A) The closed state of RfaH; PDB ID 2OUG, (B) a model of the open, RNAP-bound state of RfaH, and (C) the open state of NusG; PDB ID 2K06 and 2KVQ. Key residues are shown as ball-and-stick models; the residues at corresponding positions in RfaH and NusG are colored similarly to facilitate comparison. An ionic pair between Glu48 in the NTD and Arg138 in the CTD (in black) is essential for maintaining the closed state of RfaH (A); Glu48 corresponds to Arg62 in NusG (C). In the TEC (B), RfaH interacts with the non-template DNA (blue) and the  $\beta'$  Clamp Helices domain of RNAP (magenta); this model is supported by *in vivo* and *in vitro* analyses (Ref. 19 in the main text). Residues in red are proposed to interact with the *ops* DNA element, and their substitutions compromise recruitment; among these, only one (Arg21; red) is identical in NusG. Substitutions of Trp4, Tyr5, and Tyr8 (dark green) and Phe51, Tyr54 and Phe56 (orange) lead to defects in RNAP binding; Phe51, Tyr54 and Phe56 are located at the RfaH IDI. The CTD folds as a  $\beta$ -barrel whenever its contacts with the NTD are destabilized (*e.g.*, by E48A substitution) or abolished (*e.g.*, by cleavage of the interdomain linker or RNAP binding). This figure was prepared with Pymol 1.8.2.3 (Schrodinger, LLC).

| Residue number | Residue name | Conservation score | IDI contact area (Å <sup>2</sup> ) | Entropy | $\Delta\Delta G_{\text{bind}}$ (kcal/mol) |
|----------------|--------------|--------------------|------------------------------------|---------|-------------------------------------------|
| 2              | Gln          | 0.55               | 0.00                               | 2.13    | -8.61                                     |
| 3              | Ser          | 0.52               | 0.00                               | 2.18    | 0.97                                      |
| 4              | Trp          | 0.97               | 0.00                               | 0.00    | 0.88                                      |
| 5              | Tyr          | 0.94               | 0.00                               | 0.27    | 0.80                                      |
| 6              | Leu          | 0.92               | 31.10                              | 0.44    | 1.06                                      |
| 7              | Leu          | 0.87               | 0.00                               | 1.18    | 0.98                                      |
| 8              | Tyr          | 0.71               | 7.11                               | 0.90    | 0.74                                      |
| 9              | Cys          | 0.79               | 0.00                               | 0.49    | 0.82                                      |
| 10             | Lys          | 0.98               | 0.00                               | 0.14    | 0.86                                      |
| 11             | Arg          | 0.65               | 0.00                               | 1.00    | 0.89                                      |
| 12             | Gly          | 0.64               | 0.00                               | 1.35    | 0.00                                      |
| 13             | Gln          | 0.86               | 0.00                               | 0.68    | 0.78                                      |
| 14             | Leu          | 0.59               | 0.00                               | 1.83    | 0.98                                      |
| 15             | Gln          | 0.48               | 0.00                               | 2.31    | 0.98                                      |
| 16             | Arg          | 0.95               | 0.00                               | 0.25    | 0.98                                      |
| 17             | Ala          | 0.98               | 0.00                               | 0.01    | 0.99                                      |
| 18             | Gln          | 0.64               | 0.00                               | 1.86    | 0.98                                      |
| 19             | Glu          | 0.73               | 0.00                               | 1.63    | 0.93                                      |
| 20             | His          | 0.83               | 0.00                               | 0.46    | 1.01                                      |
| 21             | Leu          | 0.99               | 0.00                               | 0.06    | 0.90                                      |
| 22             | Glu          | 0.65               | 0.00                               | 1.93    | 0.92                                      |
| 23             | Arg          | 0.72               | 0.00                               | 1.05    | 1.04                                      |
| 24             | Gln          | 0.99               | 0.00                               | 0.01    | 1.02                                      |
| 25             | Ala          | 0.52               | 0.00                               | 2.07    | 0.94                                      |
| 26             | Val          | 0.72               | 0.00                               | 1.37    | 1.06                                      |
| 27             | Asn          | 0.59               | 0.00                               | 2.06    | 0.92                                      |
| 28             | Cys          | 0.79               | 0.00                               | 0.50    | 0.89                                      |
| 29             | Leu          | 0.70               | 0.00                               | 1.55    | 0.96                                      |
| 30             | Ala          | 0.47               | 0.00                               | 2.01    | 0.99                                      |
| 31             | Pro          | 0.98               | 0.00                               | 0.05    | 1.06                                      |
| 32             | Met          | 0.57               | 0.00                               | 1.76    | 0.91                                      |
| 33             | Ile          | 0.67               | 40.43                              | 2.05    | -0.21                                     |
| 34             | Thr          | 0.50               | 0.00                               | 2.33    | 0.95                                      |
| 35             | Leu          | 0.60               | 38.35                              | 2.34    | 1.02                                      |
| 36             | Glu          | 0.79               | 0.00                               | 1.31    | 0.97                                      |
| 37             | Lys          | 0.84               | 0.00                               | 0.81    | 1.41                                      |
| 38             | Ile          | 0.69               | 0.00                               | 1.72    | 0.90                                      |
| 39             | Val          | 0.58               | 0.00                               | 2.03    | 0.82                                      |
| 40             | Arg          | 0.74               | 0.00                               | 1.23    | 0.80                                      |
| 41             | Gly          | 0.81               | 0.00                               | 1.00    | 0.00                                      |
| 42             | Lys          | 0.83               | 0.00                               | 1.17    | 0.89                                      |
| 43             | Arg          | 0.60               | 0.00                               | 0.77    | 0.86                                      |
| 44             | Thr          | 0.54               | 0.00                               | 1.94    | 0.68                                      |
| 45             | Ala          | 0.44               | 0.00                               | 2.53    | 0.83                                      |
| 46             | Val          | 0.63               | 0.00                               | 1.87    | 1.01                                      |
| 47             | Ser          | 0.49               | 0.00                               | 2.56    | 0.95                                      |
| 48             | Glu          | 0.91               | 12.97                              | 0.57    | 1.61                                      |
| 49             | Pro          | 0.79               | 5.07                               | 0.71    | 0.91                                      |

| Residue number | Residue name | Conservation score | IDI contact area (Å <sup>2</sup> ) | Entropy | $\Delta\Delta G_{\text{bind}}$ (kcal/mol) |
|----------------|--------------|--------------------|------------------------------------|---------|-------------------------------------------|
| 50             | Leu          | 0.98               | 57.80                              | 0.45    | 1.37                                      |
| 51             | Phe          | 1.00               | 79.82                              | 0.01    | 3.06                                      |
| 52             | Pro          | 0.99               | 55.46                              | 0.02    | 1.71                                      |
| 53             | Asn          | 0.63               | 1.81                               | 1.42    | 1.02                                      |
| 54             | Tyr          | 1.00               | 57.46                              | 0.01    | 1.49                                      |
| 55             | Leu          | 0.92               | 0.00                               | 1.07    | 0.97                                      |
| 56             | Phe          | 1.00               | 12.44                              | 0.01    | 1.12                                      |
| 57             | Val          | 0.90               | 0.00                               | 0.93    | 1.09                                      |
| 58             | Glu          | 0.59               | 0.00                               | 2.01    | 1.13                                      |
| 59             | Phe          | 0.79               | 0.00                               | 1.05    | 0.85                                      |
| 60             | Asp          | 0.87               | 0.00                               | 0.80    | 0.97                                      |
| 61             | Pro          | 0.54               | 0.00                               | 1.88    | 1.02                                      |
| 62             | Glu          | 0.62               | 0.00                               | 1.76    | 1.00                                      |
| 63             | Val          | 0.31               | 0.00                               | 2.40    | 0.97                                      |
| 64             | Ile          | 0.54               | 0.00                               | 1.71    | 0.88                                      |
| 65             | His          | 0.65               | 0.00                               | 1.15    | 0.94                                      |
| 66             | Thr          | 0.59               | 0.00                               | 1.16    | 0.94                                      |
| 67             | Thr          | 0.66               | 0.00                               | 1.60    | 0.92                                      |
| 68             | Thr          | 0.67               | 0.00                               | 1.29    | 0.97                                      |
| 69             | Ile          | 0.93               | 0.00                               | 0.79    | 1.11                                      |
| 70             | Asn          | 0.65               | 0.00                               | 1.48    | 0.86                                      |
| 71             | Ala          | 0.86               | 0.00                               | 0.82    | 0.88                                      |
| 72             | Thr          | 0.99               | 0.00                               | 0.05    | 1.02                                      |
| 73             | Arg          | 0.97               | 0.00                               | 0.22    | 0.79                                      |
| 74             | Gly          | 1.00               | 0.00                               | 0.01    | 0.00                                      |
| 75             | Val          | 0.98               | 0.00                               | 0.31    | 0.96                                      |
| 76             | Ser          | 0.69               | 0.00                               | 1.62    | 0.77                                      |
| 77             | His          | 0.58               | 0.00                               | 1.28    | 0.89                                      |
| 78             | Phe          | 0.77               | 0.00                               | 0.97    | 0.78                                      |
| 79             | Val          | 0.97               | 16.59                              | 0.53    | 0.75                                      |
| 80             | Arg          | 0.65               | 0.00                               | 1.45    | 0.96                                      |
| 81             | Phe          | 0.88               | 96.40                              | 0.75    | 3.88                                      |
| 82             | Gly          | 0.90               | 0.00                               | 0.66    | 0.00                                      |
| 83             | Ala          | 0.41               | 0.00                               | 2.25    | 0.98                                      |
| 84             | Ser          | 0.47               | 0.00                               | 2.15    | 0.98                                      |
| 85             | Pro          | 0.87               | 0.00                               | 0.79    | 0.96                                      |
| 86             | Ala          | 0.56               | 0.00                               | 2.04    | 0.82                                      |
| 87             | Ile          | 0.45               | 36.80                              | 2.15    | 0.07                                      |
| 88             | Val          | 0.94               | 8.46                               | 0.74    | 0.92                                      |
| 89             | Pro          | 0.59               | 15.55                              | 1.53    | 0.48                                      |
| 90             | Ser          | 0.54               | 14.15                              | 2.18    | 0.29                                      |
| 91             | Ala          | 0.49               | 0.00                               | 2.42    | 0.59                                      |
| 92             | Val          | 0.86               | 22.81                              | 1.10    | 1.20                                      |
| 93             | Ile          | 0.97               | 90.36                              | 0.48    | 2.26                                      |
| 94             | His          | 0.52               | 0.00                               | 2.04    | 0.79                                      |
| 95             | Gln          | 0.64               | 0.00                               | 1.78    | 0.91                                      |
| 96             | Leu          | 0.83               | 72.29                              | 1.00    | 1.83                                      |
| 97             | Ser          | 0.50               | 22.94                              | 1.87    | 0.25                                      |

| Residue number | Residue name | Conservation score | IDI contact area (Å <sup>2</sup> ) | Entropy | $\Delta\Delta G_{\text{bind}}$ (kcal/mol) |
|----------------|--------------|--------------------|------------------------------------|---------|-------------------------------------------|
| 98             | Val          | 0.37               | 0.00                               | 2.46    | 0.98                                      |
| 99             | Tyr          | 0.26               | 0.00                               | 2.16    | 0.88                                      |
| 100            | Lys          | 0.24               | 21.65                              | 2.42    | 1.55                                      |
| 115            | Lys          | 0.48               | 0.00                               | 2.51    | -8.43                                     |
| 116            | Val          | 0.95               | 0.00                               | 0.51    | 0.95                                      |
| 117            | Ile          | 0.51               | 0.00                               | 2.41    | 0.95                                      |
| 118            | Ile          | 0.92               | 20.21                              | 0.83    | 1.41                                      |
| 119            | Thr          | 0.62               | 0.00                               | 1.81    | 1.09                                      |
| 120            | Glu          | 0.61               | 0.00                               | 2.14    | 0.98                                      |
| 121            | Gly          | 0.91               | 0.00                               | 0.54    | 0.00                                      |
| 122            | Ala          | 0.47               | 27.99                              | 2.16    | 1.64                                      |
| 123            | Phe          | 0.89               | 20.67                              | 0.75    | 1.57                                      |
| 124            | Glu          | 0.54               | 0.00                               | 2.13    | 0.98                                      |
| 125            | Gly          | 0.73               | 0.00                               | 1.12    | 0.00                                      |
| 126            | Phe          | 0.82               | 80.34                              | 1.63    | 3.11                                      |
| 127            | Gln          | 0.75               | 0.00                               | 1.67    | 0.97                                      |
| 128            | Ala          | 0.92               | 0.00                               | 0.40    | 0.95                                      |
| 129            | Ile          | 0.97               | 15.36                              | 0.37    | 0.29                                      |
| 130            | Phe          | 0.90               | 99.58                              | 0.81    | 2.77                                      |
| 131            | Thr          | 0.48               | 1.46                               | 2.21    | 0.95                                      |
| 132            | Glu          | 0.69               | 2.73                               | 1.56    | 0.83                                      |
| 133            | Pro          | 0.55               | 22.76                              | 1.92    | 1.15                                      |
| 134            | Asp          | 0.88               | 0.00                               | 0.83    | 0.95                                      |
| 135            | Gly          | 0.96               | 21.35                              | 0.20    | 0.00                                      |
| 136            | Glu          | 0.81               | 39.86                              | 1.23    | 0.91                                      |
| 137            | Ala          | 0.54               | 0.00                               | 2.02    | 0.99                                      |
| 138            | Arg          | 0.98               | 78.08                              | 0.01    | 4.59                                      |
| 139            | Ser          | 0.75               | 44.41                              | 1.18    | 0.43                                      |
| 140            | Met          | 0.78               | 0.55                               | 1.41    | 0.97                                      |
| 141            | Leu          | 0.86               | 0.00                               | 1.31    | 0.93                                      |
| 142            | Leu          | 0.97               | 60.64                              | 0.33    | 1.63                                      |
| 143            | Leu          | 0.86               | 57.53                              | 1.33    | 1.28                                      |
| 144            | Asn          | 0.76               | 0.00                               | 1.21    | 1.00                                      |
| 145            | Leu          | 0.84               | 6.74                               | 1.28    | 0.67                                      |
| 146            | Ile          | 0.90               | 81.28                              | 1.04    | 1.01                                      |
| 147            | Asn          | 0.66               | 16.85                              | 1.35    | 1.22                                      |
| 148            | Lys          | 0.77               | 0.00                               | 1.35    | 1.06                                      |
| 149            | Glu          | 0.67               | 23.32                              | 1.50    | 1.89                                      |
| 150            | Ile          | 0.64               | 63.75                              | 1.53    | 0.05                                      |
| 151            | Lys          | 0.46               | 19.18                              | 2.39    | 2.18                                      |
| 152            | His          | 0.53               | 0.00                               | 1.97    | 0.73                                      |
| 153            | Ser          | 0.63               | 1.04                               | 1.61    | 1.22                                      |
| 154            | Val          | 0.75               | 15.03                              | 1.30    | 1.12                                      |
| 155            | Lys          | 0.50               | 0.00                               | 1.68    | 0.83                                      |
| 156            | Asn          | 0.63               | 0.00                               | 1.07    | 0.89                                      |

**Table S1. Properties of RfaH residues.**
